# Supplementary material for: Postnatal DNA demethylation and its role in tissue maturation
Source: PubMed Central journal article supplement (PMC5966414; doi:10.1038/s41467-018-04456-6), 2018-05-23
Supplement: 41467_2018_4456_MOESM2_ESM.pdf [file 41467_2018_4456_MOESM2_ESM.pdf]

## **Descriptions of Additional Supplementary Files**

File Name: Supplementary Dataset 1

Description: 52,000 DMRs
